# Supplementary material for: Perioperative intravenous fluid for cardiothoracic surgery and acute kidney injury in Korea between 2007 and 2021
Source: Research Square preprint supplement (doi:10.21203/rs.3.rs-8643743/v1), 2026-02-16
Supplement: Supplementary file 1 [file df15770be0df155f697079c4.docx]

**Supplementary Table 1**

Supplementary Table 1 Trends in fluids and RBC transfusion by year

**Supplementary Table 2**

Supplementary Table 2 Adjusted associations of fluids with AKI in Multivariable logistic regression. In Adjusted 1 model, Synthetic colloids were analyzed as a single combined exposure. In Adjusted 2 model, on the other hand, hydroxyethyl starch and pentastarch were analyzed as individual variables.

**Supplementary Table 3**

Supplementary Table 3 Adjusted associations of fluids with dialysis in Multivariable logistic regression. In Adjusted 1 model, Synthetic colloids were analyzed as a single combined exposure. In Adjusted 2 model, on the other hand, hydroxyethyl starch and pentastarch were analyzed as individual variables.

**Supplementary Table 4**


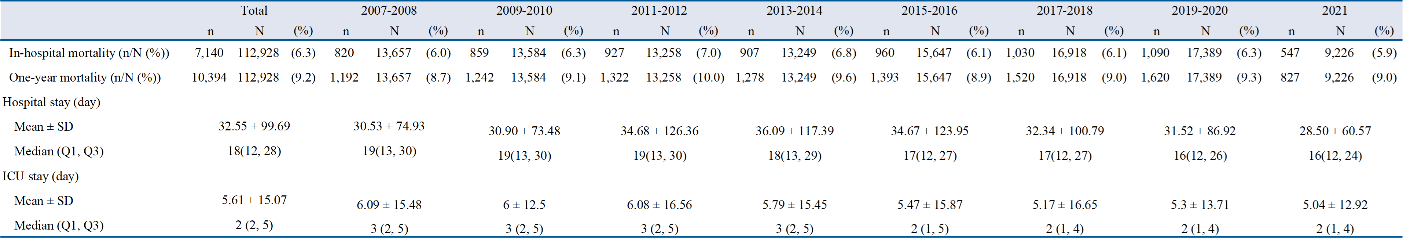


Supplementary Table 4 Mortality and length of stay by year

**Supplementary Table 5**

Supplementary Table 5 Subgroup analyses for AKI

**Supplementary Table 6**

Supplementary Table 6 Subgroup analyses for dialysis

**Supplementary Table 7**

Supplementary Table 7 Multivariable logistic regression analyses for in-hospital mortality
